# Supplementary material for: Crystal structure and vibrational spectra of bis(betaine) sulfamate
Source: Royal Society of Chemistry journal article supplement (doi:10.1039/b003284k), 2000-01-01
Supplement: supplement.doc [file supplement.doc]

# The wavenumbers ( cm-1) of infrared bands observed for powder BBAS at various temperatures.

| **12K** | **100K** | **180K** | **200K** | **210K** | **220K** | **250K** | **300K** | **Assignment** |
| --- | --- | --- | --- | --- | --- | --- | --- | --- |
| 3349 | 3351 | 3354 | 3355 | 3355 | 3355 | 3357 | 3359 | as NH2 |
| 3288 | 3287 | 3285 | 3285 | 3285 | 3286 | 3286 | 3288 | s NH2 |
| 3210 | 3205 |  |  |  |  |  |  |  |
| 3080 | 3077 | 3075 | 3073 |  |  |  |  |  |
| 3069 | 3069 | 3068 | 3068 | 3067 | 3068 | 3068 | 3067 | as CH3 |
| 3050 | 3055 | 3048 | 3047 | 3047 | 3047 | 3046 | 3046 | as CH3 |
| 3044 | 3043 | 3041 | 3041 | 3041 | 3040 | 3040 | 3039 | as CH3 |
| 3033 | 3032 | 3032 | 3031 | 3031 | 3031 | 3031 | 3004 | as CH3 |
| 3025 | 3026 | 3026 | 3026 | 3026 | 3026 | 3027 | 3027 | s CH3 |
| 3013 | 3011 | 3008 | 3008 | 3007 | 3007 | 3005 | 3004 | s CH3 |
| 2997 | 2996 | 2995 | 2994 | 2994 | 2994 | 2995 | 2992 | as CH2 |
| 1795 sh | 1795 sh |  |  |  |  |  |  |  |
| 1748 | 1746 | 1742 | 1742 | 1742 | 1742 | 1741 | 1743 |  C=O out-of-phase |
| 1654 | 1654 |  |  |  |  |  |  |  |
| 1600 | 1598 | 1593 | 1594 | 1493 | 1592 | 1590 | 1586 |  NH2 |
| 1565 | 1565 |  |  |  |  |  |  |  |
| 1506 sh | 1505 sh |  |  |  |  |  |  |  |
| 1499 sh | 1499 sh |  |  |  |  |  |  |  |
| 1491 | 1491 | 1491 | 1490 | 1490 | 1490 | 1490 | 1489 | as CH3 |
| 1480 | 1480 | 1480 | 1480 | 1479 | 1479 | 1479 | 1479 | as CH3 |
| 1473 | 1473 | 1473 | 1473 | 1473 | 1473 |  |  | as CH3 |
| 1467sh | 1467 sh | 1467 sh |  |  |  | 1466 |  |  |
| 1453 | 1453 | 1453 | 1453 | 1453 | 1453 | 1454 |  |  |
| 1446sh | 1446 sh |  |  |  |  |  |  |  |
| 1438 sh | 1440 sh | 1440 sh |  |  |  |  |  |  |
| 1415 | 1416 | 1416 | 1415 | 1415 | 1416 | 1416 | 1416 | s CH3 |
| 1406 | 1406 | 1406 | 1406 | 1406 | 1406 | 1405 |  | s CH3 |
| 1399 | 1399 | 1399 | 1398 | 1399 | 1398 | 1399 | 1400 | s CH3 |
| 1376 | 1376 | 1376 | 1376 | 1377 | 1376 | 1377 |  |  |
| 1364 sh | 1364 | 1365 | 1365 | 1365 | 1365 | 1365 |  |  |
| 1351 sh | 1351 sh | 1350 sh |  |  |  |  |  |  |
| 1336 | 1336 | 1336 | 1335 | 1335 | 1335 | 1336 | 1335 |  CH2 |
| 1309 sh | 1310 sh | 1305 sh | 1296 | 1296 | 1300 | 1291 | 1303 |  |
| 1230 | 1230 | 1230 | 1229 | 1229 | 1229 | 1229 | 1230 | as SO3 |
| 1223 | 1221 | 1219 | 1219 | 1219 | 1219 | 1219 | 1220 | as SO3 |
| 1211 | 1211 |  |  |  |  |  |  | as SO3 |
| 1185 | 1185 | 1187 | 1187 | 1187 | 1187 | 1188 | 1189 |  OH |
| 1173 | 1173 | 1174 |  |  |  |  |  |  |
| 1137 | 1137 | 1136 | 1136 | 1136 | 1136 | 1136 | 1135 | r CH3 |
| 1130 | 1130 |  |  |  |  |  |  |  |
| 1127 | 1127 | 1127 |  |  |  |  |  |  |

Table 8. continued.

| 1121 | 1122 | 1122 | 1123 | 1123 | 1123 | 1123 | 1123 |  |
| --- | --- | --- | --- | --- | --- | --- | --- | --- |
| 1100 | 1099 | 1098 | 1098 | 1098 | 1097 | 1097 | 1095 |  NH2 |
| 1070 | 1069 | 1069 | 1069 | 1069 | 1070 | 1070 |  |  |
| 1049 sh | 1049 sh | 1048 sh | 1048sh | 1047sh |  |  |  |  |
| 1045 | 1045 | 1045 | 1044 | 1044 | 1044 | 1044 | 1045 | s SO3 |
| 1040 sh |  | 1040 sh |  |  |  |  |  |  |
| 1011 | 1011 | 1010 | 1008 | 1008 | 1008 | 1009 | 1008 | as C3N |
| 1008 | 1009 | 1007 |  |  |  |  |  |  |
| 999 | 998 | 996 | 996 | 996 | 996 | 995 | 993 | as C3N |
| 993 | 993 | 993 sh |  |  |  |  |  |  |
| 958 | 958 | 958 | 958 | 958 | 958 | 958 | 957 |  C-C |
| 939 | 937 | 937 | 937 | 936 | 936 | 936 | 935 |  |
| 919 sh | 916 sh | 915 sh | 915 sh | 913 sh | 913 sh | 913 sh |  |  |
| 901* | 901* | 899* | 900* | 900* | 900* | 900* | 899* |  C-N |
| 882* | 882* | 881* | 881* |  |  |  |  |  |
| 824* | 825* | 830* | 830* |  |  |  |  |  |
| 782* | 782* | 781* | 781* | 780* | 781* | 780* | 780* | s C3N |
| 759* | 756* | 750* | 747* |  |  |  |  |  |
| 734 | 735 | 731 | 731 | 731 |  |  |  |  |
| 698* | 700* | 702* | 704* | 705* | 704* | 705* | 707* |  COO |
| 595 | 595 | 595 sh |  |  |  |  |  |  |
| 589 | 588 | 589 |  |  |  |  |  |  |
| 584 | 584 | 584 | 584 | 584 | 584 | 584 | 584 |  COO |
| 562 | 562 | 562 | 561 | 561 | 561 | 561 | 561 | as SO3 |
| 553 | 553 | 553 | 553 | 553 | 553 | 553 | 553 | as SO3 |
| 542* | 542* | 542* | 542* | 542* | 542* | 542* | 542* | r COO |
| 475 | 473 |  |  |  |  |  |  |  |
| 445 | 445 |  |  |  |  |  |  | s C3N |
| 441 | 442 |  |  |  |  |  |  | s C3N |
| 439 | 438 |  |  |  |  |  |  |  |
